# Supplementary material for: Oral Microbiota and Porphyromonas Gingivalis Kgp Genotypes Altered in Parkinson’s Disease with Mild Cognitive Impairment
Source: Research Square preprint supplement (doi:10.21203/rs.3.rs-3590898/v1), 2023-11-16
Supplement: Supplementary file 1 [file 5aa1fea6fa1bddc4f01369dc.xlsx]

## Sheet: article information
Article title:Oral Microbiota and Porphyromonas Gingivalis Kgp Genotypes Altered in Parkinson’s Disease with Mild Cognitive Impairment
Journal name: Molecular Neurobiology
Author names: Dongcheng Li · Tengzhu Ren · Hao Li · Mingdi Huang · Jiaxin Chen · Qishan He · Wei Lv · Hailing Liu · Renshi Xu · Xiong Zhang
Corresponding author:
Hailing Liu
Department of Neurology, Affiliated Maoming People’s Hospital, Southern Medical University, Maoming, China.
1332620671@qq.com
Renshi Xu
Department of Neurology, Jiangxi Provincial People’s Hospital, The First Affiliated Hospital of Nanchang Medical College, Clinical College of Nanchang Medical College, Nanchang, China.
xurenshi@ncu.edu.cn
Xiong Zhang
Department of Neurology, Affiliated Maoming People’s Hospital, Southern Medical University, Maoming, China.
xiong715@126.com

## Sheet: clinical date
sample No.	Group	sample name	SEX	Age	Education（years）	Height (cm)	Weight (kg)	BMI	Duration	H-Y stage	MDS-UPDRS III	BOP+	plaque index	BOHSE	MMSE	MoCA	PDQ-39	Anti-Parkinson medicine	COMT- inhibitors
1	PC	PC-A1	M	69	15	167	64	22.95				50.00	1.61	10	30	30
2	PC	PC-A2	F	63	7	156	55	22.60				60.71	2.14	14	29	27
3	PC	PC-A3	M	67	6	166	60	21.77				46.43	1.29	8	30	30
4	PC	PC-A4	M	54	16	171	70	23.94				28.57	1.07	6	28	26
5	PC	PC-A5	M	55	12	169	68	23.81				57.14	0.71	11	29	30
6	PC	PC-A6	M	75	5	173	73	24.39				88.89	1.14	16	29	27
7	PC	PC-A7	M	57	10	170	75	25.95				53.33	1.53	12	28	28
8	PC	PC-A8	F	45	12	155	50	20.81				53.57	1.64	10	29	29
9	PC	PC-A9	M	70	3	165	54	19.83				56.67	1.67	14	30	26
10	PC	PC-A10	M	56	15	172	63	21.30				24.14	0.69	4	30	30
11	PC	PC-B1	F	60	9	153	49	20.93				65.38	1.16	14	28	27
12	PC	PC-B2	M	63	6	168	60	21.26				59.38	1.03	11	29	26
13	PC	PC-B3	M	61	15	175	70	22.86				60.00	2.03	13	29	29
14	PC	PC-B4	F	66	18	160	52	20.31				37.93	1.03	6	28	26
15	PC	PC-B5	F	66	12	151	47	20.61				33.33	0.77	6	30	28
16	PD-MCI	PD-MCI-A1	M	62	6	164	56	20.82	1	1	20	39.29	1.00	7	26	22	33	Yes	No
17	PD-MCI	PD-MCI-A2	F	67	12	157	50	20.28	3	1	18	44.44	1.15	7	28	22	40	Yes	No
18	PD-MCI	PD-MCI-A3	F	61	9	155	46	19.15	4	1.5	25	58.62	1.72	11	25	20	45	Yes	No
19	PD-MCI	PD-MCI-A4	M	59	6	161	60	23.15	4	2	30	53.33	1.63	10	28	23	30	Yes	No
20	PD-MCI	PD-MCI-A5	M	55	12	164	66	24.54	3	1	36	43.75	1.38	8	26	20	29	Yes	No
21	PD-MCI	PD-MCI-A6	M	77	12	170	61	21.11	3	1	32	50.00	1.73	11	27	20	41	Yes	No
22	PD-MCI	PD-MCI-A7	M	45	15	166	59	21.41	1	1	20	42.86	1.18	9	26	21	30	No	No
23	PD-MCI	PD-MCI-A8	M	66	12	165	60	22.04	10	2.5	40	58.33	1.96	12	28	22	62	Yes	Yes
24	PD-MCI	PD-MCI-A9	F	64	9	150	45	20.00	2	1	34	43.33	1.27	7	25	19	49	No	No
25	PD-MCI	PD-MCI-A10	F	54	6	152	45	19.48	3	1	28	57.14	1.64	10	24	23	50	Yes	No
26	PD-MCI	PD-MCI-B1	F	65	1	162	55	20.96	9	3	30	65.00	2.05	12	26	20	70	Yes	Yes
27	PD-MCI	PD-MCI-B2	M	68	6	169	64	22.41	3	1	25	46.15	1.27	7	25	19	43	Yes	No
28	PD-MCI	PD-MCI-B3	F	59	5	153	60	25.63	5	1	40	100.00	2.00	18	24	19	34	Yes	No
29	PD-MCI	PD-MCI-B4	M	70	9	170	68	23.53	5	1.5	38	64.29	2.14	11	26	22	57	Yes	No
30	PD-MCI	PD-MCI-B5	M	59	9	167	62	22.23	1	1	22	53.57	1.79	9	25	18	40	Yes	No
31	PD-MCI	PD-MCI-B6	M	68	15	165	60	22.04	8	2	39	72.73	2.64	13	28	24	64	Yes	Yes
32	PD-MCI	PD-MCI-B7	M	56	12	170	65	22.49	1	1	21	35.71	0.75	6	26	25	55	No	No
33	PD-MCI	PD-MCI-B8	F	53	10	160	53	20.70	1	1	16	56.25	1.13	10	28	23	39	No	No
34	PD-MCI	PD-MCI-B9	F	69	6	158	50	20.03	2	1	28	78.26	2.17	14	22	19	44	Yes	No
35	PD-MCI	PD-MCI-B10	M	55	6	171	67	22.91	2	1.5	14	46.67	1.67	9	27	19	27	Yes	No
36	PD-NC	PD-NC-A1	F	67	5	157	45	18.26	1	1	21	57.69	1.96	10	28	26	46	Yes	No
37	PD-NC	PD-NC-A2	M	59	9	165	60	22.04	5	1.5	24	38.46	1.38	6	30	28	42	Yes	No
38	PD-NC	PD-NC-A3	M	75	12	176	70	22.60	9	2	42	71.43	1.93	13	30	29	80	Yes	Yes
39	PD-NC	PD-NC-A4	M	67	6	174	72	23.78	2	1	19	90.00	2.20	16	29	26	24	Yes	No
40	PD-NC	PD-NC-A5	M	59	16	170	68	23.53	4	1	20	71.43	1.18	14	30	26	66	Yes	No
41	PD-NC	PD-NC-A6	M	50	16	171	63	21.55	1	1	15	35.71	0.86	7	28	26	44	No	No
42	PD-NC	PD-NC-A7	M	63	14	160	60	23.44	2	1	18	53.33	0.73	10	29	26	52	Yes	No
43	PD-NC	PD-NC-A8	F	54	14	162	51	19.43	2	1	18	35.71	1.00	6	30	27	49	Yes	No
44	PD-NC	PD-NC-A9	F	47	6	156	50	20.55	1	1	16	42.86	1.04	9	27	26	32	Yes	No
45	PD-NC	PD-NC-A10	M	55	12	173	68	22.72	2	1	20	50.00	1.71	10	30	29	45	Yes	No
46	PD-NC	PD-NC-B1	F	67	10	151	44	19.30	7	2.5	37	67.86	1.79	12	30	28	53	Yes	Yes
47	PD-NC	PD-NC-B2	F	60	12	157	47	19.07	3	1	31	90.48	2.57	16	29	26	50	Yes	No
48	PD-NC	PD-NC-B3	M	70	12	168	64	22.68	4	2	28	92.86	2.21	15	30	27	43	Yes	No
49	PD-NC	PD-NC-B4	M	63	10	165	54	19.83	5	1.5	38	72.22	1.67	12	26	26	51	Yes	No
50	PD-NC	PD-NC-B5	F	63	2	161	60	23.15	2	1.5	23	47.62	0.95	8	30	30	35	Yes	No

## Sheet: qPCR date
sample number	sample name	copy number	Sample dilution factor	Genomic DNA volume（μL）	Copy number of target genes in the original sample (copies/μL DNA)	Average copy number of target genes in the original samples (copies/μL DNA)	Total copy number of target genes in the original sample (copies/sample)	Average total copy number of target genes in the original samples (copies/sample)
1	PC-A1	13480	100	50	1348000	1.41667e+06	67400000	7.08333e+07
1	PC-A1	15110	100	50	1511000		75550000
1	PC-A1	13910	100	50	1391000		69550000
2	PC-A2	243	100	50	24300	24880	1215000	1244000
2	PC-A2	252.7	100	50	25270		1263500
2	PC-A2	250.7	100	50	25070		1253500
3	PC-A3	<1.000E0	5	50	-	-	-	-
3	PC-A3	<1.000E0	5	50	-		-
3	PC-A3	<1.000E0	5	50	-		-
4	PC-A4	9.817	100	50	981.7	1292.23	49085	64611.7
4	PC-A4	18.52	100	50	1852		92600
4	PC-A4	10.43	100	50	1043		52150
5	PC-A5	<1.000E0	5	50	-	-	-	-
5	PC-A5	<1.000E0	5	50	-		-
5	PC-A5	<1.000E0	5	50	-		-
6	PC-A6	3.908	100	50	390.8	251.867	19540	12593.3
6	PC-A6	1.117	100	50	111.7		5585
6	PC-A6	2.531	100	50	253.1		12655
7	PC-A7	20.75	5	50	103.75	109.017	5187.5	5450.83
7	PC-A7	22.58	5	50	112.9		5645
7	PC-A7	22.08	5	50	110.4		5520
8	PC-A8	<1.000E0	5	50	-	-	-	-
8	PC-A8	<1.000E0	5	50	-		-
8	PC-A8	<1.000E0	5	50	-		-
9	PC-A9	6.6	5	50	33	36.7567	1650	1837.83
9	PC-A9	6.787	5	50	33.935		1696.75
9	PC-A9	8.667	5	50	43.335		2166.75
10	PC-A10	19.28	5	50	96.4	81.4167	4820	4070.83
10	PC-A10	12.95	5	50	64.75		3237.5
10	PC-A10	16.62	5	50	83.1		4155
11	PC-B1	4195	100	50	419500	869300	20975000	43465000
11	PC-B1	13940	100	50	1394000		69700000
11	PC-B1	7944	100	50	794400		39720000
12	PC-B2	<1.000E0	5	50	-	-	-	-
12	PC-B2	<1.000E0	5	50	-		-
12	PC-B2	<1.000E0	5	50	-		-
13	PC-B3	4.339	5	50	21.695	22.5067	1084.75	1125.33
13	PC-B3	5.314	5	50	26.57		1328.5
13	PC-B3	3.851	5	50	19.255		962.75
14	PC-B4	3.193	100	50	319.3	232.567	15965	11628.3
14	PC-B4	2.514	100	50	251.4		12570
14	PC-B4	1.27	100	50	127		6350
15	PC-B5	2938	100	50	293800	276267	14690000	1.38133e+07
15	PC-B5	3063	100	50	306300		15315000
15	PC-B5	2287	100	50	228700		11435000
16	PD-MCI-A1	2.127	100	50	212.7	424.733	10635	21236.7
16	PD-MCI-A1	6.482	100	50	648.2		32410
16	PD-MCI-A1	4.133	100	50	413.3		20665
17	PD-MCI-A2	<1.000E0	5	50	-	-	-	-
17	PD-MCI-A2	<1.000E0	5	50	-		-
17	PD-MCI-A2	<1.000E0	5	50	-		-
18	PD-MCI-A3	<1.000E0	5	50	-	-	-	-
18	PD-MCI-A3	<1.000E0	5	50	-		-
18	PD-MCI-A3	<1.000E0	5	50	-		-
19	PD-MCI-A4	11.67	5	50	58.35	64.9167	2917.5	3245.83
19	PD-MCI-A4	12.35	5	50	61.75		3087.5
19	PD-MCI-A4	14.93	5	50	74.65		3732.5
20	PD-MCI-A5	956.3	100	50	95630	122110	4781500	6105500
20	PD-MCI-A5	1231	100	50	123100		6155000
20	PD-MCI-A5	1476	100	50	147600		7380000
21	PD-MCI-A6	58.92	100	50	5892	7476.33	294600	373817
21	PD-MCI-A6	86.71	100	50	8671		433550
21	PD-MCI-A6	78.66	100	50	7866		393300
22	PD-MCI-A7	<1.000E0	5	50	-	-	-	-
22	PD-MCI-A7	<1.000E0	5	50	-		-
22	PD-MCI-A7	<1.000E0	5	50	-		-
23	PD-MCI-A8	<1.000E0	5	50	-	-	-	-
23	PD-MCI-A8	<1.000E0	5	50	-		-
23	PD-MCI-A8	<1.000E0	5	50	-		-
24	PD-MCI-A9	964.2	100	50	96420	97020	4821000	4851000
24	PD-MCI-A9	1020	100	50	102000		5100000
24	PD-MCI-A9	926.4	100	50	92640		4632000
25	PD-MCI-A10	51.06	100	50	5106	4936	255300	246800
25	PD-MCI-A10	49.56	100	50	4956		247800
25	PD-MCI-A10	47.46	100	50	4746		237300
26	PD-MCI-B1	<1.000E0	5	50	-	-	-	-
26	PD-MCI-B1	<1.000E0	5	50	-		-
26	PD-MCI-B1	<1.000E0	5	50	-		-
27	PD-MCI-B2	2127	100	50	212700	209300	10635000	10465000
27	PD-MCI-B2	2111	100	50	211100		10555000
27	PD-MCI-B2	2041	100	50	204100		10205000
28	PD-MCI-B3	<1.000E0	5	50	-	-	-	-
28	PD-MCI-B3	<1.000E0	5	50	-		-
28	PD-MCI-B3	<1.000E0	5	50	-		-
29	PD-MCI-B4	<1.000E0	5	50	-	-	-	-
29	PD-MCI-B4	<1.000E0	5	50	-		-
29	PD-MCI-B4	<1.000E0	5	50	-		-
30	PD-MCI-B5	44	5	50	220	238.967	11000	11948.3
30	PD-MCI-B5	61.25	5	50	306.25		15312.5
30	PD-MCI-B5	38.13	5	50	190.65		9532.5
31	PD-MCI-B6	<1.000E0	5	50	-	-	-	-
31	PD-MCI-B6	<1.000E0	5	50	-		-
31	PD-MCI-B6	<1.000E0	5	50	-		-
32	PD-MCI-B7	2010	100	50	201000	195067	10050000	9.75333e+06
32	PD-MCI-B7	1969	100	50	196900		9845000
32	PD-MCI-B7	1873	100	50	187300		9365000
33	PD-MCI-B8	1.5	10	50	15	15	750	750
33	PD-MCI-B8	<1.000E0	10	50	-		-
33	PD-MCI-B8	<1.000E0	10	50	-		-
34	PD-MCI-B9	62.12	10	50	621.2	585.733	31060	29286.7
34	PD-MCI-B9	58.04	10	50	580.4		29020
34	PD-MCI-B9	55.56	10	50	555.6		27780
35	PD-MCI-B10	213000	10	50	2130000	2.00267e+06	106500000	1.00133e+08
35	PD-MCI-B10	200400	10	50	2004000		100200000
35	PD-MCI-B10	187400	10	50	1874000		93700000
36	PD-NC-A1	15810	10	50	158100	155133	7905000	7.75667e+06
36	PD-NC-A1	15600	10	50	156000		7800000
36	PD-NC-A1	15130	10	50	151300		7565000
37	PD-NC-A2	<1.000E0	10	50	-	-	-	-
37	PD-NC-A2	<1.000E0	10	50	-		-
37	PD-NC-A2	<1.000E0	10	50	-		-
38	PD-NC-A3	2.592	5	50	12.96	18.0333	648	901.667
38	PD-NC-A3	3.688	5	50	18.44		922
38	PD-NC-A3	4.54	5	50	22.7		1135
39	PD-NC-A4	2.997	5	50	14.985	19.335	749.25	966.75
39	PD-NC-A4	3.874	5	50	19.37		968.5
39	PD-NC-A4	4.73	5	50	23.65		1182.5
40	PD-NC-A5	<1.000E0	10	50	-	-	-	-
40	PD-NC-A5	<1.000E0	10	50	-		-
40	PD-NC-A5	<1.000E0	10	50	-		-
41	PD-NC-A6	214.2	10	50	2142	2064	107100	103200
41	PD-NC-A6	211.7	10	50	2117		105850
41	PD-NC-A6	193.3	10	50	1933		96650
42	PD-NC-A7	<1.000E0	5	50	-	-	-	-
42	PD-NC-A7	<1.000E0	5	50	-		-
42	PD-NC-A7	<1.000E0	5	50	-		-
43	PD-NC-A8	6351	10	50	63510	60433.3	3175500	3.02167e+06
43	PD-NC-A8	5930	10	50	59300		2965000
43	PD-NC-A8	5849	10	50	58490		2924500
44	PD-NC-A9	1450000	10	50	14500000	1.36933e+07	725000000	6.84667e+08
44	PD-NC-A9	1413000	10	50	14130000		706500000
44	PD-NC-A9	1245000	10	50	12450000		622500000
45	PD-NC-A10	859.8	10	50	8598	7885.33	429900	394267
45	PD-NC-A10	780.5	10	50	7805		390250
45	PD-NC-A10	725.3	10	50	7253		362650
46	PD-NC-B1	1137	10	50	11370	11153.3	568500	557667
46	PD-NC-B1	1122	10	50	11220		561000
46	PD-NC-B1	1087	10	50	10870		543500
47	PD-NC-B2	<1.000E0	5	50	-	-	-	-
47	PD-NC-B2	<1.000E0	5	50	-		-
47	PD-NC-B2	<1.000E0	5	50	-		-
48	PD-NC-B3	<1.000E0	5	50	-	-	-	-
48	PD-NC-B3	<1.000E0	5	50	-		-
48	PD-NC-B3	<1.000E0	5	50	-		-
49	PD-NC-B4	69750	10	50	697500	687900	34875000	34395000
49	PD-NC-B4	68830	10	50	688300		34415000
49	PD-NC-B4	67790	10	50	677900		33895000
50	PD-NC-B5	3629	5	50	18145	17590	907250	879500
50	PD-NC-B5	3591	5	50	17955		897750
50	PD-NC-B5	3334	5	50	16670		833500
